# Supplementary material
Source: PubMed Central journal article supplement (PMC2797872)
Supplement: mmc1.pdf [file mmc1.pdf]

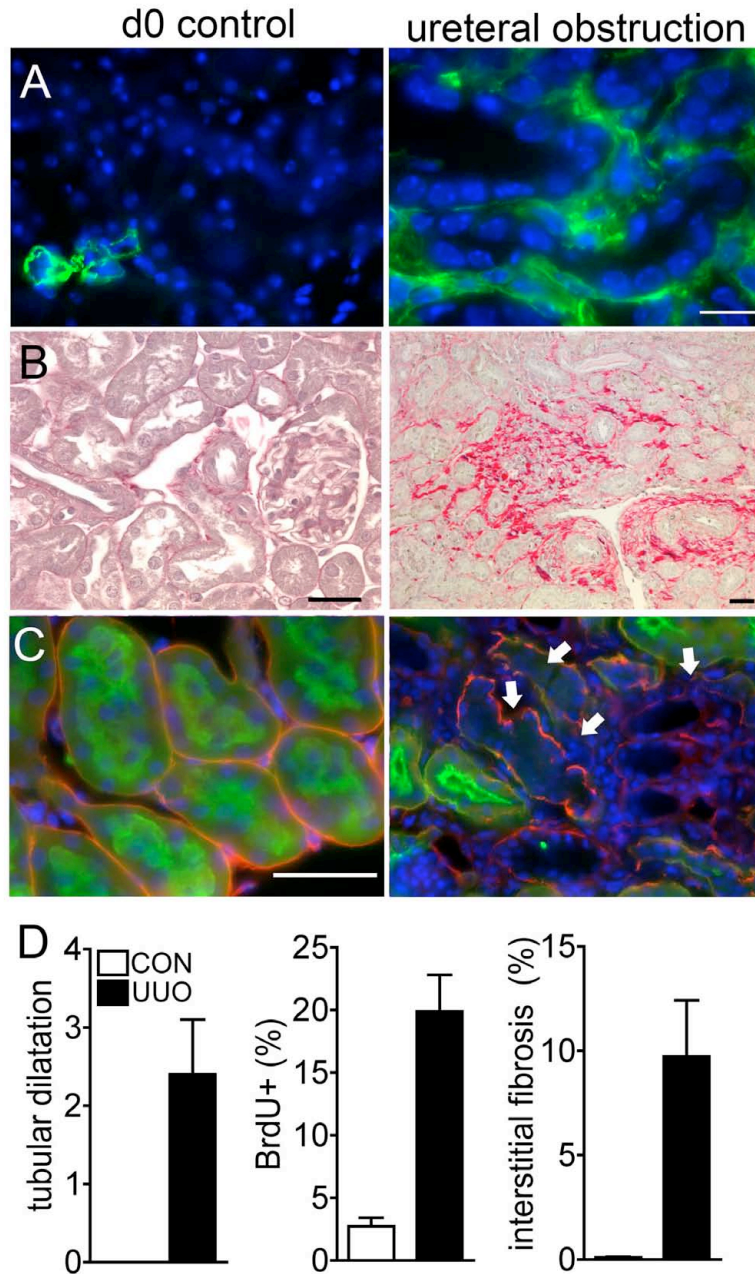

**Supplementary Figure 1.** Unilateral ureteral obstruction in Six2-GC+; Z/Red mice results in severe tubule injury fibrosis and disruption of basement membranes. **(A)** In normal kidney  $\alpha$ SMA (green) is only in vascular smooth muscle cells, but there is induction of numerous  $\alpha$ -SMA labeled interstitial

myofibroblasts in UUO d10. Scale bar = 50 $\mu$ m. **(B)** Picrosirius red staining of paraffin sections from d0 control and d14 UUO kidney. Scale bars = 50 $\mu$ m. **(C)** Immunodetection of Laminin (red) and lotus lectin binding to detect proximal tubules in healthy kidney and d10 UUO kidney. Note multiple areas of disrupted tubule basement membrane in the UUO kidney (arrows). Scale bar = 200 $\mu$ m. **(D)** Graphs showing tubular dilatation score of d10 UUO kidneys compared with control (left), BrdU positive tubule nuclei in UUO kidneys (center) and morphometric assessment of fibrosis by area of picrosirius red staining in d14 UUO compared with control (right).
