# Supplementary material
Source: PubMed Central journal article supplement (PMC2797872)
Supplement: mmc2.pdf [file mmc2.pdf]

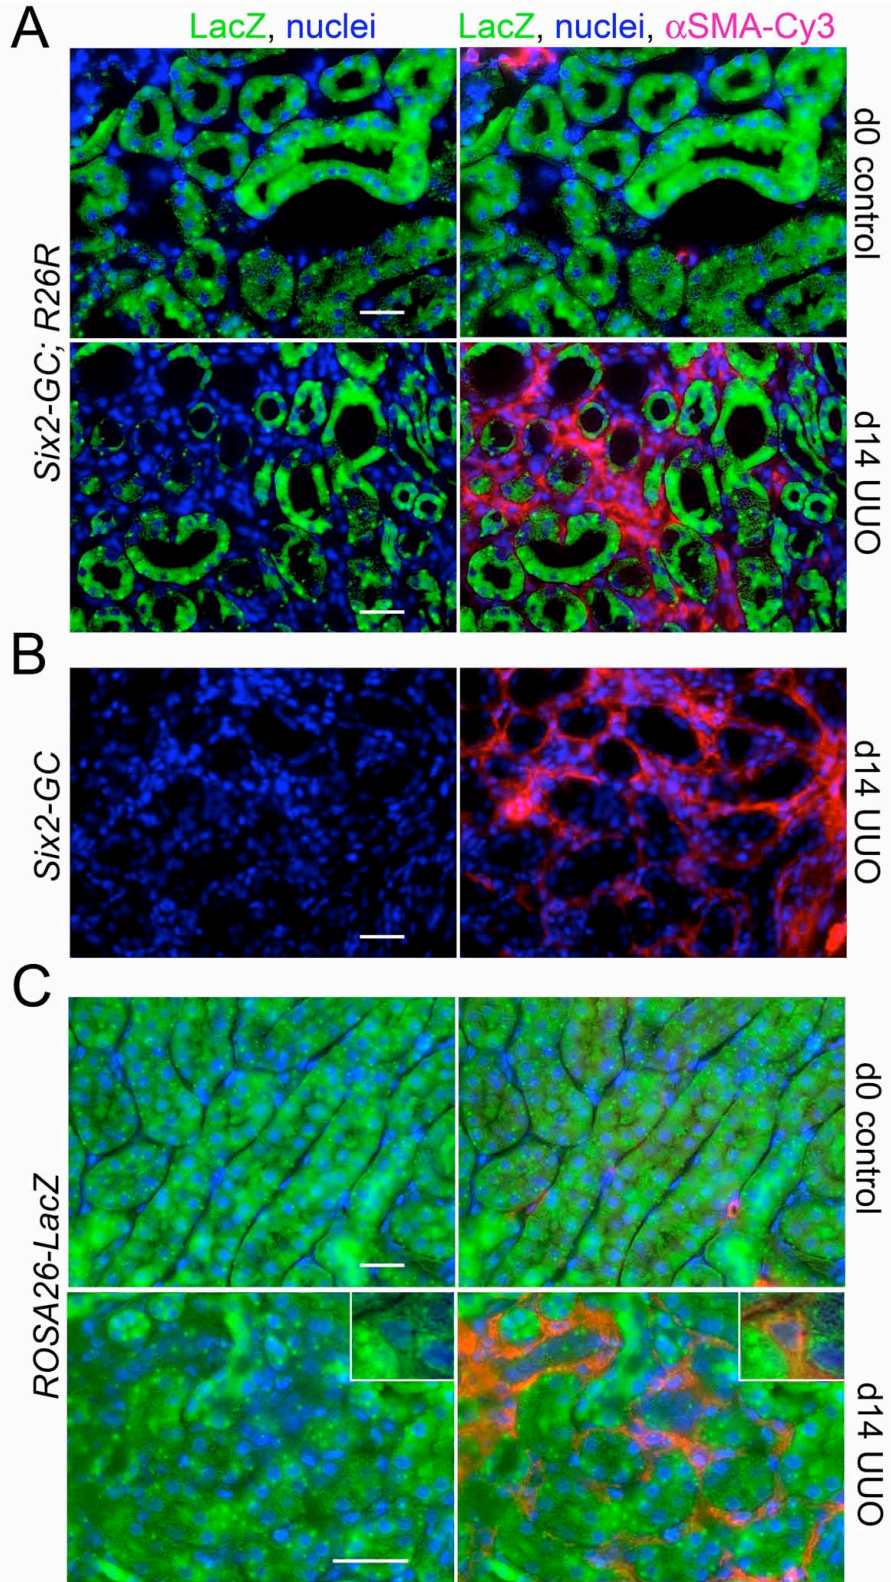

**Supplementary Figure 2.** In d14 UUO kidney from Six2-GC; R26R mice,  $\alpha$ SMA stained myofibroblasts do not express the epithelial marker LacZ. **(A)** Kidney sections from d0 control and d14 UUO Six2-GC; ROSA26R mice stained with X-gal for bacterial  $\beta$ -gal activity (green [false color]), and co-labeled with directly conjugated anti- $\alpha$ SMA antibodies (red). Left panels show identical images to right panels except that the red channel is absent. Note while there is strong staining for LacZ in tubules there is no co-expression of LacZ in cells expressing  $\alpha$ SMA. **(B)** Kidney sections from d14 UUO Six2-GC mice co-stained with X-gal for bacterial  $\beta$ -gal activity (green), and  $\alpha$ SMA (red). Note there is no LacZ activity in these kidneys stained under identical conditions. **(C)** Kidney sections from d0 control and d14 UUO ROSA26-LacZ mice (positive control) that express *LacZ* in all tissues stained with X-gal for LacZ activity (green), and co-labeled with directly conjugated anti- $\alpha$ SMA antibodies (red). Left panels show identical images to right panels except that the red channel is absent. Note that X-gal staining is present in all cells and LacZ activity in myofibroblasts is clearly visible in cells co-expressing  $\alpha$ SMA (see higher magnification inset in lower panels). Scale bars = 50 $\mu$ m.
