# Supplementary material
Source: PubMed Central journal article supplement (PMC2797872)
Supplement: mmc3.pdf [file mmc3.pdf]

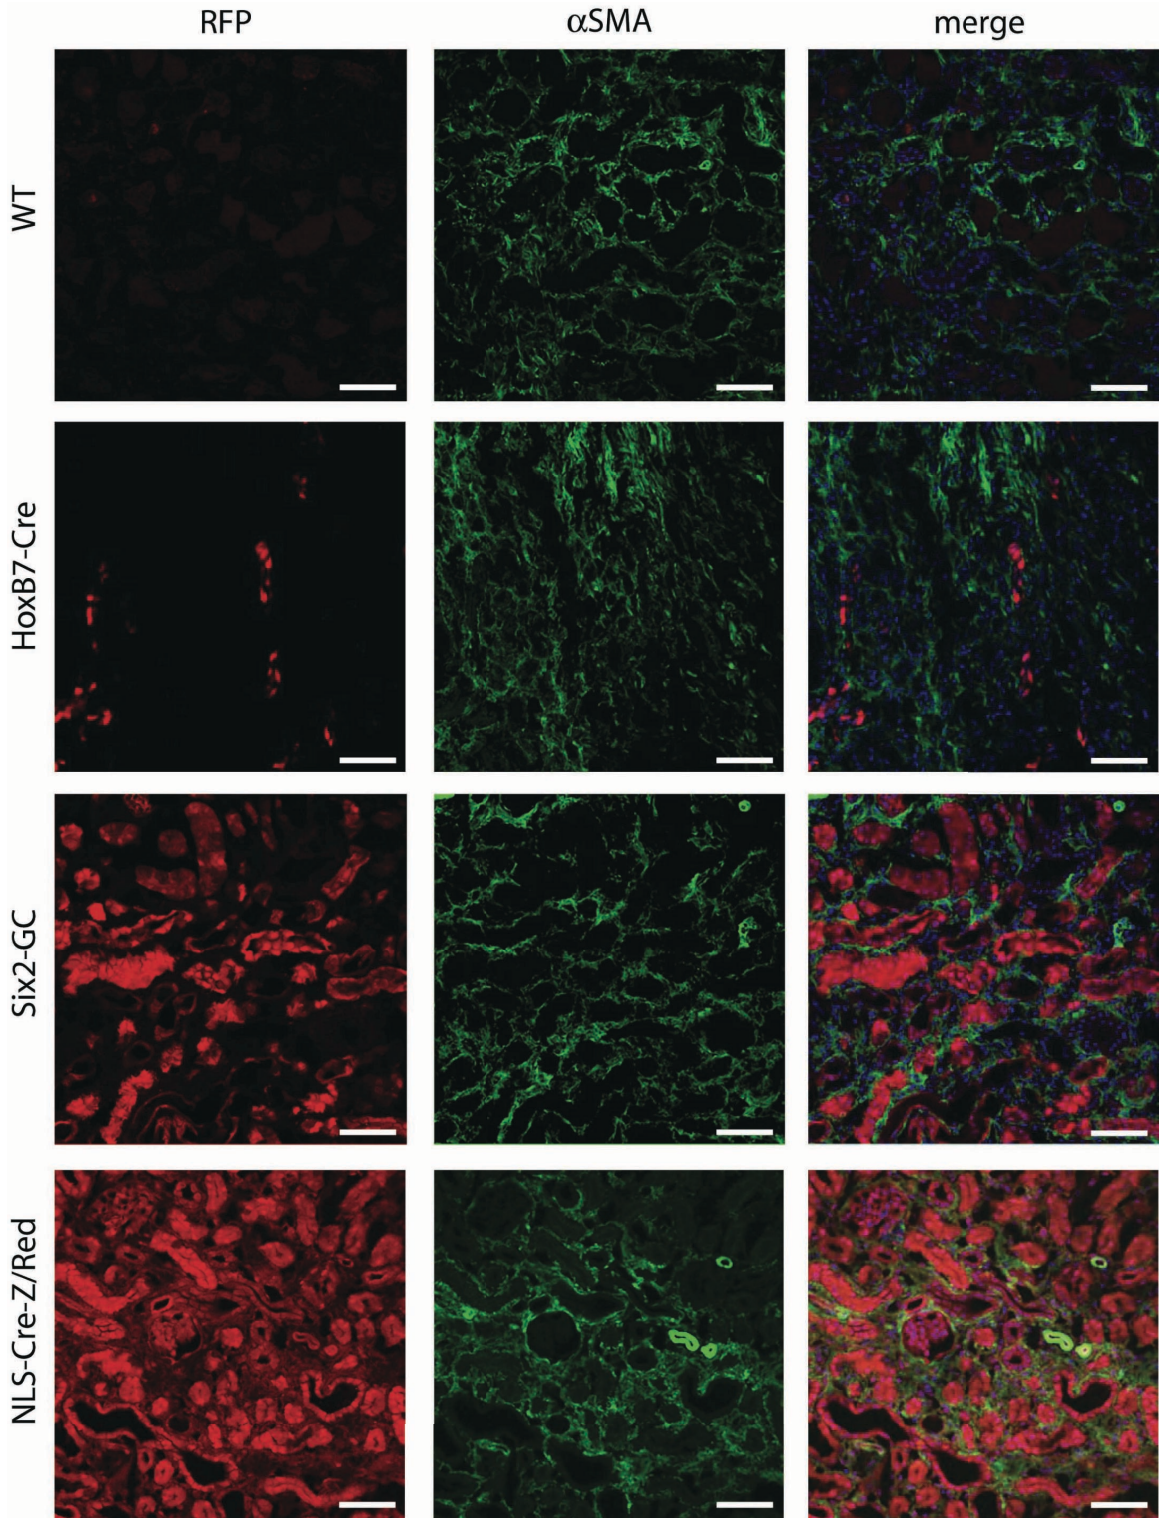

**Supplementary Figure 3.** Day 10 unilateral ureteral obstruction kidneys from Six2-GC<sup>+</sup>; Z/Red and HoxB7-Cre; Z/Red mice show no evidence for RFP+

genetically labeled epithelial cells, becoming interstitial cells expressing  $\alpha$ SMA<sup>+</sup>. Representative low magnification confocal images of native RFP epifluorescence (left panels) or FITC-conjugated antibody detection of  $\alpha$ SMA (green, centre panels) of d10 UUO fibrotic kidneys of Z/Red mice, HoxB7-Cre; Z/Red mice Six2-GC; Z/Red mice and NLS-Cre-Z/Red mice. Composite images with nuclei in blue are seen (right panels). Note that all interstitial cells expressing  $\alpha$ SMA co-express RFP in the NLS-Cre-Z/Red positive control mice but no  $\alpha$ SMA<sup>+</sup> cells co-express RFP in the other mice. Scale bar = 50 $\mu$ m.
